# Supplementary material for: A novel sensing platform based on periodate-oxidized chitosan
Source: Royal Society of Chemistry journal article supplement (doi:10.1039/c0ay00499e), 2010-01-01
Supplement: c0ay00499e.pdf [file c0ay00499e.pdf]

## Supplementary material

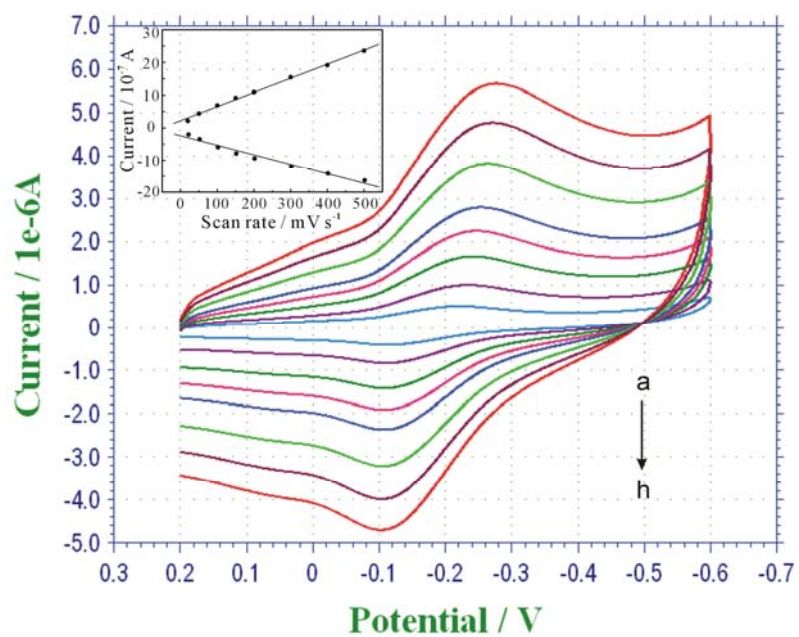

Fig. S1 CVs of the TH-COH-CS/GCE in 0.1 M PBS (pH 6.5) at different scan rates of (a) 20, (b) 50, (c) 100, (d) 150, (e) 200, (f) 300, (g) 400, (h) 500  $\text{mV s}^{-1}$ . Inset shows the plots of peak current versus the scan rate.

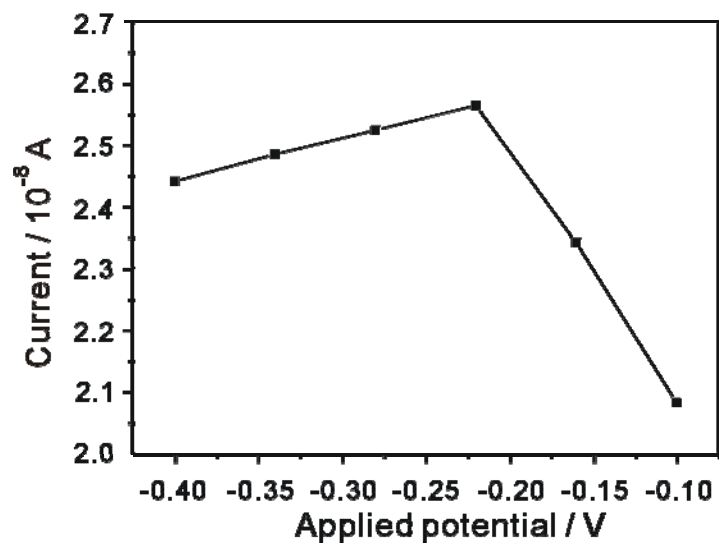

Fig. S2 Effect of the applied potential on the response of TH-COH-CS/GCE to 0.5 mM H<sub>2</sub>O<sub>2</sub> in 0.1 M PBS (pH 6.5).
